# Supplementary material
Source: PubMed Central journal article supplement (PMC7374760)
Supplement: NIHMS1604443-supplement-Permissions_Summary___Docs.pdf [file NIHMS1604443-supplement-Permissions_Summary___Docs.pdf]

In Figure 4, there are 5 images that have been published. I have the permission to use them based on the following permission.

1. A (left panel) is from Development paper

<https://www.ncbi.nlm.nih.gov/pubmed/26893347?dopt=Citation>

I am the corresponding author of this paper, and generate this image in my lab. I also contact Development journal for permission of using this image in Circulation.

2. A (right panel) is from Nature paper.

<https://www.ncbi.nlm.nih.gov/pubmed/26375005?dopt=Citation>

I am the author of this paper. I have logged onto Nature Permission & Use website, and fill the information required. I could use it in Circulation without charge. I attached the related information below.

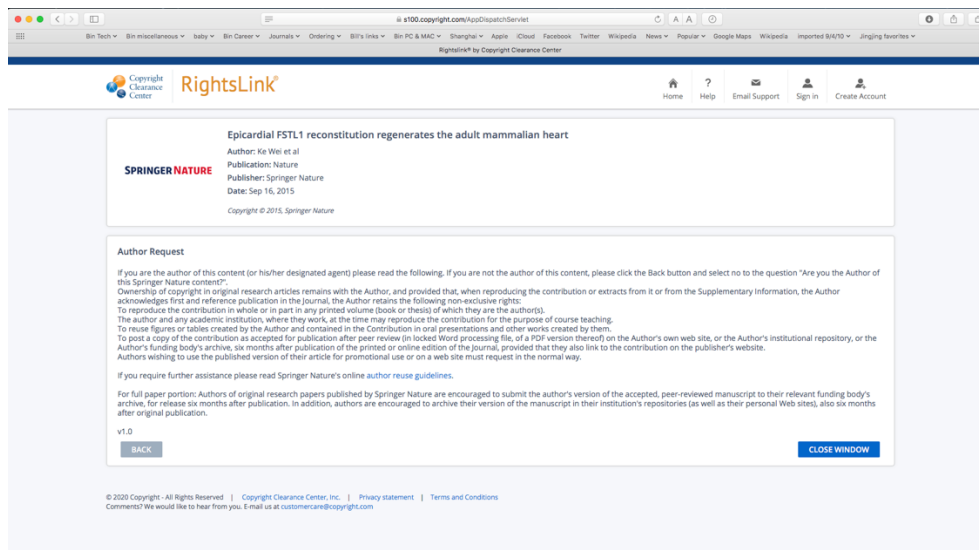

3. D (right panel) is from Nature Communications.

<https://www.nature.com/articles/s41467-018-02891-z>

Reza Ardehali (co-author of this Circulation paper) is also the corresponding author of this Nature Communication paper.

I have contacted Nature Communications, and got the permission of using this specific image (attached email).

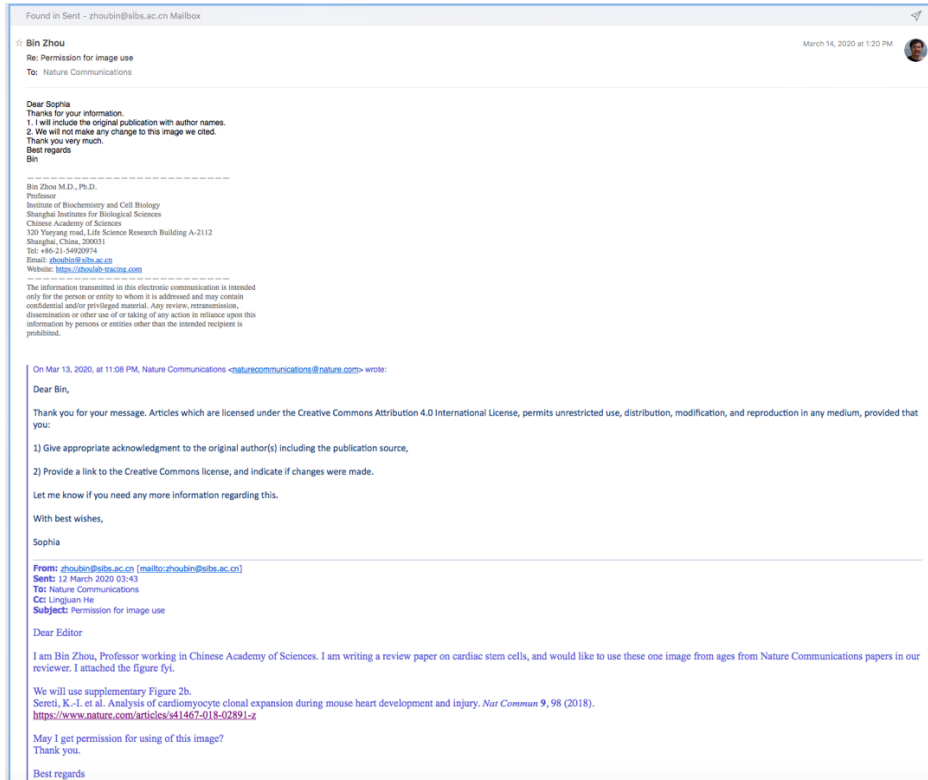

4. Image in C is from PNAS 2014.

<https://www.ncbi.nlm.nih.gov/pubmed/24876275?dopt=Citation>

5. Image in E is from PNAS 2019.

<https://www.ncbi.nlm.nih.gov/pubmed/30530645?dopt=Citation>

For the above two images, I have contacted PNAS. (attached emails below)

For Image C, PNAS permits us to use it.

For Image in E, we need to contact the corresponding author Hans Clevers of this PNAS 2019 paper for permission of using this image. I attached the permission of use this image from Dr. Hans Clevers.

PNAS Permissions

March 13, 2020 at 4:03 AM

Details PP

RE: Use of image  
To: Bin Zhou, Cc: 何灵娟

Thank you for your message. However, PNAS can only grant permission for the following:

1. Ali SR *et al.* (2014) Existing cardiomyocytes generate cardiomyocytes at a low rate after birth in mice. *Proc Natl Acad Sci U S A* 111(24):8850–8855. (we use Figure 2B)  
Please include a full citation for the original PNAS article when reusing this material. Because this material published after 2008, a copyright note is not needed. There is no charge for this material, either.

PNAS is not authorized to grant permission for the following:

2. Kretzschmar K *et al.* (2018) Profiling proliferative cells and their progeny in damaged murine hearts. *Proc Natl Acad Sci U S A* 115:E12245–E12254. (we use Figure 4E)  
This PNAS article published under a CC BY-NC-ND license; please refer to <https://creativecommons.org/licenses/by-nc-nd/4.0/> for a summary of terms and conditions. Let us know if you have any questions.

Sincerely,

Kay McLaughlin for  
Diane Sullenberger  
PNAS Executive Editor

---

**From:** zhoubin@sibs.ac.cn <zhoubin@sibs.ac.cn>  
**Sent:** Wednesday, March 11, 2020 10:30 PM  
**To:** PNAS <PNAS@nas.edu>; PNAS Permissions <PNASPermissions@nas.edu>  
**Cc:** Lingjuan He <hellingjuan@sibs.ac.cn>  
**Subject:** Use of image

Dear Editor

I am Bin Zhou, Professor working in Chinese Academy of Sciences. I am writing a review paper on cardiac stem cells, and would like to use these two images from PNAS papers in our reviewer. I attached the figure fyi.

They are from references:

1. Ali SR *et al.* (2014) Existing cardiomyocytes generate cardiomyocytes at a low rate after birth in mice. *Proc Natl Acad Sci U S A* 111(24):8850–8855. (we use Figure 2B)
2. Kretzschmar K *et al.* (2018) Profiling proliferative cells and their progeny in damaged murine hearts. *Proc Natl Acad Sci U S A* 115:E12245–E12254. (we use Figure 4E)

For your convenience, these two papers are also attached.

May I get permission for using of these two images?  
Thank you.

Best regards  
Bin

Hans Clevers @

March 13, 2020 at 5:14 PM

HC

Re: image use for review  
To: Bin Zhou

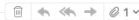

Dear Bin  
Of course you have my permission!  
Kind regards

Hans Clevers

---

**From:** zhoubin@sibs.ac.cn <zhoubin@sibs.ac.cn>  
**Sent:** Friday, March 13, 2020 4:08 AM  
**To:** Hans Clevers <h.clevers@hubrecht.eu>  
**Cc:** Bin Zhou <zhoubin@sibs.ac.cn>  
**Subject:** Image use for review

Dear Hans

I am Bin Zhou, a researcher working in Shanghai Institute of Biochemistry and Cell Biology. It's nice to talk with you during a tumor research meeting in Shanghai in 2019 April. My lab is interested in developing new genetic approaches such as dual recombinases-mediated lineage tracing. I have introduced you some research work in how to use dual genetic approach to seamlessly recording tissue-specific proliferation in vivo, such as cardiomyocytes. Thanks for your valuable suggestions and comments on my work.

I wrote a review recently for Circulation on cardiac stem cell, cardiomyocyte proliferation and heart regeneration. I would like to cite some key references, including your recently beautiful Klf6-CreER tracing work. I would like to use one image (Figure 4E) from your published PNAS paper (Kretzschmar *et al.* PNAS 2018, under a CC BY-NC-ND license). I attached the figure that contains this image for your information.

Thank you for your permission of using this image.

Best regards  
Bin

---

Bin Zhou M.D., Ph.D.  
Professor  
Institute of Biochemistry and Cell Biology  
Shanghai Institutes for Biological Sciences  
Chinese Academy of Sciences  
320 Yueyang road, Life Science Research Building A-2112  
Shanghai, China, 200031  
Tel: +86-21-54901974  
Email: [zhoubin@sibs.ac.cn](mailto:zhoubin@sibs.ac.cn)  
Website: <https://zhoulab-tracing.com>

The information transmitted in this electronic communication is intended only for the person or entity to whom it is addressed and may contain confidential and/or privileged material. Any review, retransmission, dissemination or other use of or taking of any action in reliance upon this information by persons or entities other than the intended recipient is prohibited.
